# Supplementary material for: Fatigue, post-exertional malaise and orthostatic intolerance: a map of Cochrane evidence relevant to rehabilitation for people with post COVID-19 condition
Source: PubMed Central journal article supplement — Eur J Phys Rehabil Med. 2022 Dec 6;58(6):857–63. doi: 10.23736/S1973-9087.22.07802-9 (PMC10077961; doi:10.23736/s1973-9087.22.07802-9), 2022-12-06
Supplement: Supplementary_Digital_Material1.pdf [file Supplementary_Digital_Material1.pdf]

SUPPLEMENTARY DIGITAL MATERIAL 1

Supplementary Table I—Characteristics of the studies included on fatigue.

| <b>Authors</b>  | <b>Title</b>                                                                  | <b>Total N° included studies (N° participants)</b> | <b>Population</b>                                                                   | <b>Setting</b>                                                   | <b>Intervention</b>               | <b>Control</b> | <b>Outcome</b> | <b>Outcome Measurements</b>                   | <b>N° studies (N° participants)</b> | <b>Effect</b> | <b>GRADE</b> |
|-----------------|-------------------------------------------------------------------------------|----------------------------------------------------|-------------------------------------------------------------------------------------|------------------------------------------------------------------|-----------------------------------|----------------|----------------|-----------------------------------------------|-------------------------------------|---------------|--------------|
| <b>Lee 2017</b> | PEP therapy versus other ACTs for bronchiectasis                              | 9 (213)                                            | Patients with a diagnosis of bronchiectasis of any origin, with the exception of CF | Hospital inpatient and outpatient department, home-based therapy | Oscillatory PEP therapy (flutter) | ACBT with GAD  | Fatigue        | CRQ Fatigue score End of 4 weeks intervention | 1 (17)                              | No effect     | LOW          |
| <b>Lee 2017</b> | Positive expiratory pressure therapy versus other airway clearance techniques | 9 (213)                                            | Patients with a diagnosis of bronchiectasis of any origin,                          | Hospital inpatient and outpatient department, home-              | Oscillatory PEP therapy           | ACBT with GAD  | Fatigue        | Borg dyspnoea score End of single session     | 1 (36)                              | No effect     | NR           |

|                        |                                                                                                                                   |              |                                                                                                                                |                                                                                                         |                                |         |         |                                                          |           |                           |              |
|------------------------|-----------------------------------------------------------------------------------------------------------------------------------|--------------|--------------------------------------------------------------------------------------------------------------------------------|---------------------------------------------------------------------------------------------------------|--------------------------------|---------|---------|----------------------------------------------------------|-----------|---------------------------|--------------|
|                        | for<br>brochiectasis                                                                                                              |              | with<br>the<br>excepti<br>on of<br>CF                                                                                          | based<br>therap<br>y                                                                                    |                                |         |         |                                                          |           |                           |              |
| <b>Lee 2017</b>        | Positive<br>expiratory<br>pressure<br>therapy<br>versus<br>other<br>airway<br>clearance<br>techniques<br>for<br>brochiecta<br>sis | 9 (213)      | Patient<br>s with<br>a<br>diagno<br>sis of<br>bronchi<br>ectasis<br>of any<br>origin,<br>with<br>the<br>excepti<br>on of<br>CF | Hospit<br>al<br>inpatie<br>nt and<br>outpati<br>ent<br>depart<br>ment,<br>home-<br>based<br>therap<br>y | Oscillat<br>ory PEP<br>therapy | ACBT    | Fatigue | Borg<br>dyspnoea<br>score<br>End of<br>single<br>session | 1 (36)    | Favor<br>compar<br>ator   | NR           |
| <b>Lahart<br/>2018</b> | Physical<br>activity for<br>women<br>with breast<br>cancer<br>after<br>adjuvant<br>therapy                                        | 63<br>(5761) | Wome<br>n with<br>breast<br>cancer<br>after<br>adjuva<br>nt<br>therapy                                                         | Home-<br>based,<br>facility<br>-based,<br>and<br>combi<br>ned<br>home<br>and<br>facility<br>-based      | Physical<br>activity           | Control | Fatigue | FACT-F<br>(0-52<br>points)<br>End<br>interventi<br>on    | 26 (2020) | Favor<br>interve<br>ntion | MODER<br>ATE |
| <b>Lahart<br/>2018</b> | Physical<br>activity for<br>women<br>with breast<br>cancer<br>after                                                               | 63<br>(5761) | Wome<br>n with<br>breast<br>cancer<br>after<br>adjuva                                                                          | Home-<br>based,<br>facility<br>-based,<br>and<br>combi                                                  | Physical<br>activity           | Control | Fatigue | FACT-F<br>(0-52<br>points)<br>Follow-up<br>values:       | 7 (536)   | Favor<br>interve<br>ntion | NR           |

|                    | adjuvant therapy                                                      |           | nt therapy                                        | ned home and facility-based                                       |                                                         |                                            |         | median 12 weeks |           |                     |     |
|--------------------|-----------------------------------------------------------------------|-----------|---------------------------------------------------|-------------------------------------------------------------------|---------------------------------------------------------|--------------------------------------------|---------|-----------------|-----------|---------------------|-----|
| <b>Lahart 2018</b> | Physical activity for women with breast cancer after adjuvant therapy | 63 (5761) | Wome n with breast cancer after adjuva nt therapy | Home-based, facility-based, and combi ned home and facility-based | Physical activity                                       | Control                                    | Fatigue | FACT-F          | 13 (1289) | No effect           | LOW |
| <b>Lahart 2018</b> | Physical activity for women with breast cancer after adjuvant therapy | 63 (5761) | Wome n with breast cancer after adjuva nt therapy | Home-based, facility-based, and combi ned home and facility-based | Physical activity                                       | Control                                    | Fatigue | FACT-F          | 4 (178)   | Favor interve ntion | NR  |
| <b>Lahart 2018</b> | Physical activity for women with breast cancer after adjuvant therapy | 63 (5761) | Wome n with breast cancer after adjuva nt therapy | Home-based, facility-based, and combi ned home                    | Educati onal interven tions (deliver ed by nurse or OT) | Control (usual care or attentio n control) |         |                 | 12 (1711) | Favor interve ntion | LOW |

|                    |                                                                       |           |                                                 |                                                                  |                                                      |                                           |  |  |          |                    |          |
|--------------------|-----------------------------------------------------------------------|-----------|-------------------------------------------------|------------------------------------------------------------------|------------------------------------------------------|-------------------------------------------|--|--|----------|--------------------|----------|
|                    |                                                                       |           |                                                 | and facility-based                                               |                                                      |                                           |  |  |          |                    |          |
| <b>Lahart 2018</b> | Physical activity for women with breast cancer after adjuvant therapy | 63 (5761) | Women with breast cancer after adjuvant therapy | Home-based, facility-based, and combined home and facility-based | Educational interventions (delivered by nurse or OT) | Control (usual care or attention control) |  |  | 8 (1524) | Favor intervention | MODERATE |
| <b>Lahart 2018</b> | Physical activity for women with breast cancer after adjuvant therapy | 63 (5761) | Women with breast cancer after adjuvant therapy | Home-based, facility-based, and combined home and facility-based | Educational interventions (delivered by nurse or OT) | Control (usual care or attention control) |  |  | 3 (622)  | Favor intervention | LOW      |
| <b>Lahart 2018</b> | Physical activity for women with breast cancer after adjuvant therapy | 63 (5761) | Women with breast cancer after adjuvant therapy | Home-based, facility-based, and combined home and                | Educational interventions (delivered by nurse or OT) | Control (usual care or attention control) |  |  | 4 (439)  | Favor intervention | MODERATE |

|                    |                                                                       |           |                                                 |                                                                  |                                                     |                      |  |  |         |                    |          |
|--------------------|-----------------------------------------------------------------------|-----------|-------------------------------------------------|------------------------------------------------------------------|-----------------------------------------------------|----------------------|--|--|---------|--------------------|----------|
|                    |                                                                       |           |                                                 | facility-based                                                   |                                                     |                      |  |  |         |                    |          |
| <b>Lahart 2018</b> | Physical activity for women with breast cancer after adjuvant therapy | 63 (5761) | Women with breast cancer after adjuvant therapy | Home-based, facility-based, and combined home and facility-based | Home-based multidimensional survivorship programmes | Control              |  |  | 3 (127) | Favor intervention | LOW      |
| <b>Lahart 2018</b> | Physical activity for women with breast cancer after adjuvant therapy | 63 (5761) | Women with breast cancer after adjuvant therapy | Home-based, facility-based, and combined home and facility-based | Exercise intervention                               | Control              |  |  | 3 (449) | Favor intervention | MODERATE |
| <b>Lahart 2018</b> | Physical activity for women with breast cancer after adjuvant therapy | 63 (5761) | Women with breast cancer after adjuvant therapy | Home-based, facility-based, and combined home                    | Physical exercise                                   | No physical exercise |  |  | 9 (826) | Favor intervention | MODERATE |

|                    |                                                                       |           |                                                 |                                                                  |                                                                                                                |            |  |  |         |                    |          |
|--------------------|-----------------------------------------------------------------------|-----------|-------------------------------------------------|------------------------------------------------------------------|----------------------------------------------------------------------------------------------------------------|------------|--|--|---------|--------------------|----------|
|                    |                                                                       |           |                                                 | and facility-based                                               |                                                                                                                |            |  |  |         |                    |          |
| <b>Lahart 2018</b> | Physical activity for women with breast cancer after adjuvant therapy | 63 (5761) | Women with breast cancer after adjuvant therapy | Home-based, facility-based, and combined home and facility-based | Physical activity (aerobic or resistance training, flexibility- or balance training or a combination of these) | Usual care |  |  | 6 (230) | Favor intervention | LOW      |
| <b>Lahart 2018</b> | Physical activity for women with breast cancer after adjuvant therapy | 63 (5761) | Women with breast cancer after adjuvant therapy | Home-based, facility-based, and combined home and facility-based | Physical activity (aerobic or resistance training, flexibility- or balance training or a combination of these) | Usual care |  |  | 3 (113) | No effect          | MODERATE |

|                    |                                                                       |           |                                                 |                                                                  |                                                                                                                |               |  |  |         |                    |     |
|--------------------|-----------------------------------------------------------------------|-----------|-------------------------------------------------|------------------------------------------------------------------|----------------------------------------------------------------------------------------------------------------|---------------|--|--|---------|--------------------|-----|
| <b>Lahart 2018</b> | Physical activity for women with breast cancer after adjuvant therapy | 63 (5761) | Women with breast cancer after adjuvant therapy | Home-based, facility-based, and combined home and facility-based | Physical activity (aerobic or resistance training, flexibility- or balance training or a combination of these) | Usual care    |  |  | 7 (277) | Favor intervention | LOW |
| <b>Lahart 2018</b> | Physical activity for women with breast cancer after adjuvant therapy | 63 (5761) | Women with breast cancer after adjuvant therapy | Home-based, facility-based, and combined home and facility-based | Physical activity (aerobic or resistance training, flexibility- or balance training or a combination of these) | Usual care    |  |  | 3 (91)  | No effect          | LOW |
| <b>Lahart 2018</b> | Physical activity for women with breast cancer after                  | 63 (5761) | Women with breast cancer after adjuva           | Home-based, facility-based, and combi                            | Exercise group                                                                                                 | Control group |  |  | 3 (68)  | No effect          | NR  |

|                    |                                                                       |           |                                                 |                                                                  |                                                                    |                                     |  |  |           |                    |          |
|--------------------|-----------------------------------------------------------------------|-----------|-------------------------------------------------|------------------------------------------------------------------|--------------------------------------------------------------------|-------------------------------------|--|--|-----------|--------------------|----------|
|                    | adjuvant therapy                                                      |           | nt therapy                                      | ned home and facility-based                                      |                                                                    |                                     |  |  |           |                    |          |
| <b>Lahart 2018</b> | Physical activity for women with breast cancer after adjuvant therapy | 63 (5761) | Women with breast cancer after adjuvant therapy | Home-based, facility-based, and combined home and facility-based | Exercise training                                                  | Control                             |  |  | 3 (90)    | No effect          | NR       |
| <b>Lahart 2018</b> | Physical activity for women with breast cancer after adjuvant therapy | 63 (5761) | Women with breast cancer after adjuvant therapy | Home-based, facility-based, and combined home and facility-based | Exercise (aerobic or resistance exercise or a combination of both) | Control (usual care or no exercise) |  |  | 19 (1698) | Favor intervention | MODERATE |
| <b>Lahart 2018</b> | Physical activity for women with breast cancer after adjuvant therapy | 63 (5761) | Women with breast cancer after adjuvant therapy | Home-based, facility-based, and combined home and                | Exercise (aerobic or resistance exercise or a combina              | Control (usual care or no exercise) |  |  | 8 (814)   | Favor intervention | NR       |



|                    |                                                                       |           |                                                 |                                                                  |                                                                                           |            |  |  |        |           |          |
|--------------------|-----------------------------------------------------------------------|-----------|-------------------------------------------------|------------------------------------------------------------------|-------------------------------------------------------------------------------------------|------------|--|--|--------|-----------|----------|
|                    |                                                                       |           |                                                 | facility-based                                                   | tion of both)                                                                             |            |  |  |        |           |          |
| <b>Lahart 2018</b> | Physical activity for women with breast cancer after adjuvant therapy | 63 (5761) | Women with breast cancer after adjuvant therapy | Home-based, facility-based, and combined home and facility-based | Exercise plus usual care                                                                  | Usual care |  |  | 1 (20) | No effect | VERY LOW |
| <b>Lahart 2018</b> | Physical activity for women with breast cancer after adjuvant therapy | 63 (5761) | Women with breast cancer after adjuvant therapy | Home-based, facility-based, and combined home and facility-based | Multimodal intervention (exercise plus other interventions) plus usual care vs usual care | Usual care |  |  | 1 (44) | No effect | VERY LOW |

|                    |                                                                       |           |                                                 |                                                                  |      |                                        |  |  |          |                    |          |
|--------------------|-----------------------------------------------------------------------|-----------|-------------------------------------------------|------------------------------------------------------------------|------|----------------------------------------|--|--|----------|--------------------|----------|
| <b>Lahart 2018</b> | Physical activity for women with breast cancer after adjuvant therapy | 63 (5761) | Women with breast cancer after adjuvant therapy | Home-based, facility-based, and combined home and facility-based | Yoga | No therapy                             |  |  | 11 (883) | Favor intervention | MODERATE |
| <b>Lahart 2018</b> | Physical activity for women with breast cancer after adjuvant therapy | 63 (5761) | Women with breast cancer after adjuvant therapy | Home-based, facility-based, and combined home and facility-based | Yoga | No therapy                             |  |  | 2 (146)  | No effect          | LOW      |
| <b>Lahart 2018</b> | Physical activity for women with breast cancer after adjuvant therapy | 63 (5761) | Women with breast cancer after adjuvant therapy | Home-based, facility-based, and combined home and facility-based | Yoga | Psychosocial/educational interventions |  |  | 2 (106)  | Favor intervention | MODERATE |

|                     |                                                                                  |           |                                                 |                                                                  |                                                      |                                           |         |                   |           |                    |          |
|---------------------|----------------------------------------------------------------------------------|-----------|-------------------------------------------------|------------------------------------------------------------------|------------------------------------------------------|-------------------------------------------|---------|-------------------|-----------|--------------------|----------|
| <b>Lahart 2018</b>  | Physical activity for women with breast cancer after adjuvant therapy            | 63 (5761) | Women with breast cancer after adjuvant therapy | Home-based, facility-based, and combined home and facility-based | Yoga                                                 | Exercise                                  |         |                   | 3 (233)   | No effect          | VERY LOW |
| <b>Bennett 2016</b> | Educational interventions for the management of cancer-related fatigue in adults | 14 (2213) | Patients with cancer-related fatigue (adults)   | Outpatients and community                                        | Educational interventions (delivered by nurse or OT) | Control (usual care or attention control) | Fatigue | General fatigue   | 12 (1711) | Favor intervention | LOW      |
| <b>Bennett 2016</b> | Educational interventions for the management of cancer-related fatigue in adults | 14 (2213) | Patients with cancer-related fatigue (adults)   | Outpatients and community                                        | Educational interventions (delivered by nurse or OT) | Control (usual care or attention control) | Fatigue | Fatigue intensity | 8 (1524)  | Favor intervention | MODERATE |

|                     |                                                                                   |           |                                               |                           |                                                      |                                                                                                                |         |                         |         |                    |          |
|---------------------|-----------------------------------------------------------------------------------|-----------|-----------------------------------------------|---------------------------|------------------------------------------------------|----------------------------------------------------------------------------------------------------------------|---------|-------------------------|---------|--------------------|----------|
| <b>Bennett 2016</b> | Education al interventions for the management of cancer-related fatigue in adults | 14 (2213) | Patients with cancer-related fatigue (adults) | Outpatients and community | Educational interventions (delivered by nurse or OT) | Control (usual care or attention control)                                                                      | Fatigue | Fatigue distress        | 3 (622) | Favor intervention | LOW      |
| <b>Bennett 2016</b> | Education al interventions for the management of cancer-related fatigue in adults | 14 (2213) | Patients with cancer-related fatigue (adults) | Outpatients and community | Educational interventions (delivered by nurse or OT) | Control (usual care or attention control)                                                                      | Fatigue | Fatigue interference    | 4 (439) | Favor intervention | MODERATE |
| <b>Cheng 2017</b>   | Home-based multidimensional survivorship programmes for breast cancer survivors   | 26 (2272) | Breast cancer survivors                       | Home-based                | Home-based multidimensional survivorship programmes  | Control (usual care or different type of intervention, as stress management or exercise, or attention control) | Fatigue | Brief Fatigue Inventory | 3 (127) | Favor intervention | LOW      |

|                        |                                                                                                                             |           |                                                                                   |                                                                                  |                                                                                                    |                                                                        |                        |                                                                            |         |                    |          |
|------------------------|-----------------------------------------------------------------------------------------------------------------------------|-----------|-----------------------------------------------------------------------------------|----------------------------------------------------------------------------------|----------------------------------------------------------------------------------------------------|------------------------------------------------------------------------|------------------------|----------------------------------------------------------------------------|---------|--------------------|----------|
| <b>Loughney 2018</b>   | Exercise interventions for people undergoing multimodal cancer treatment that includes surgery                              | 11 (1067) | People with cancer undergoing multimodal treatment including surgery              | Hospital/community                                                               | Exercise intervention                                                                              | Usual care                                                             | Fatigue                | Multidimensional fatigue inventory (Follow-up: range 18 weeks to 24 weeks) | 3 (449) | Favor intervention | MODERATE |
| <b>Knips 2019</b>      | Aerobic physical exercise for adult patients with haematological malignancies                                               | 18 (1892) | Adults with haematological malignancies                                           | Inpatient or outpatients                                                         | Physical exercise                                                                                  | No physical exercise                                                   | Fatigue                |                                                                            | 9 (826) | Favor intervention | MODERATE |
| <b>McGettigan 2020</b> | Physical activity for disease-related physical and mental health during and following treatment in people with non-advanced | 16 (992)  | Adults with non-advanced colorectal cancer treated surgically or with neoadjuvant | All but one study undertaken in high-income countries. Included home-based self- | Aerobic or resistance training, flexibility or balance training or a combination of these, lasting | Control intervention (usual care or no physical activity intervention) | Cancer-related fatigue | FACIT-F and FACT-F (Follow-up: up to 12 weeks)                             | 6 (230) | Favor intervention | LOW      |

|                        |                                                                                                                                               |          |                                                                                                                |                                                                                                                                      |                                                                                                                     |                                                                        |                        |                                                                     |         |           |          |
|------------------------|-----------------------------------------------------------------------------------------------------------------------------------------------|----------|----------------------------------------------------------------------------------------------------------------|--------------------------------------------------------------------------------------------------------------------------------------|---------------------------------------------------------------------------------------------------------------------|------------------------------------------------------------------------|------------------------|---------------------------------------------------------------------|---------|-----------|----------|
|                        | colorectal cancer                                                                                                                             |          | or adjuvant therapy, or both                                                                                   | directed and supervised physical activity programmes                                                                                 | at least 4 weeks                                                                                                    |                                                                        |                        |                                                                     |         |           |          |
| <b>McGettigan 2020</b> | Physical activity for disease-related physical and mental health during and following treatment in people with non-advanced colorectal cancer | 16 (992) | Adults with non-advanced colorectal cancer treated surgically or with neoadjuvant or adjuvant therapy, or both | All but one study undertaken in high-income countries. Included home-based self-directed and supervised physical activity programmes | Aerobic or resistance training, flexibility or balance training or a combination of these, lasting at least 4 weeks | Control intervention (usual care or no physical activity intervention) | Cancer-related fatigue | FACIT-F and FACT-F (Follow-up: change from baseline up to 12 weeks) | 3 (113) | No effect | MODERATE |

|                             |                                                                                                                                               |          |                                                                                                               |                                                                                                                                      |                                                                                                                     |                                                                        |                        |                                                                 |         |                    |     |
|-----------------------------|-----------------------------------------------------------------------------------------------------------------------------------------------|----------|---------------------------------------------------------------------------------------------------------------|--------------------------------------------------------------------------------------------------------------------------------------|---------------------------------------------------------------------------------------------------------------------|------------------------------------------------------------------------|------------------------|-----------------------------------------------------------------|---------|--------------------|-----|
| <b>McGettig<br/>an 2020</b> | Physical activity for disease-related physical and mental health during and following treatment in people with non-advanced colorectal cancer | 16 (992) | Adults with no-advanced colorectal cancer treated surgically or with neoadjuvant or adjuvant therapy, or both | All but one study undertaken in high-income countries. Included home-based self-directed and supervised physical activity programmes | Aerobic or resistance training, flexibility or balance training or a combination of these, lasting at least 4 weeks | Control intervention (usual care or no physical activity intervention) | Cancer-related fatigue | FACIT-F and FACT-F (Follow-up: more than 12 weeks to 6 months)  | 7 (277) | Favor intervention | LOW |
| <b>McGettig<br/>an 2020</b> | Physical activity for disease-related physical and mental health during and following treatment in people with non-                           | 16 (992) | Adults with no-advanced colorectal cancer treated surgically or with                                          | All but one study undertaken in high-income countries. Included home-                                                                | Aerobic or resistance training, flexibility or balance training or a combination of                                 | Control intervention (usual care or no physical activity intervention) | Cancer-related fatigue | FACIT-F and FACT-F (Follow-up: more than 6 months to 12 months) | 3 (91)  | No effect          | LOW |

|                             |                                                                                                          |         |                                          |                                                                 |                                                               |                      |         |                                                                                                           |        |           |    |
|-----------------------------|----------------------------------------------------------------------------------------------------------|---------|------------------------------------------|-----------------------------------------------------------------|---------------------------------------------------------------|----------------------|---------|-----------------------------------------------------------------------------------------------------------|--------|-----------|----|
|                             | advanced colorectal cancer                                                                               |         | neoadjuvant or adjuvant therapy, or both | based self-directed and supervised physical activity programmes | these, lasting at least 4 weeks                               |                      |         |                                                                                                           |        |           |    |
| <b>Cavalheri 2019</b>       | Exercise training undertaken by people within 12 months of lung resection for non-small cell lung cancer | 3 (68)  | People with non-small cell lung cancer   | NR                                                              | Exercise group                                                | Control group        | Fatigue | The Functional Assessment of Chronic Illness Therapy – Fatigue Subscale (FACIT-fatigue) and EORTC QLQ-C30 | 3 (68) | No effect | NR |
| <b>Peddle-McIntyre 2019</b> | Exercise training for advanced lung cancer                                                               | 6 (221) | Adults with advanced lung cancer         | NR                                                              | Exercise training (interventions ranged in length from six to | No exercise training | Fatigue | Functional Assessment of Chronic Illness Therapy – Fatigue Subscale, EORTC Fatigue,                       | 3 (90) | No effect | NR |



|                       |                                                                 |           |                                                             |                          |                                                         |                                                                                 |         |                                                                                                                                    |           |                    |          |
|-----------------------|-----------------------------------------------------------------|-----------|-------------------------------------------------------------|--------------------------|---------------------------------------------------------|---------------------------------------------------------------------------------|---------|------------------------------------------------------------------------------------------------------------------------------------|-----------|--------------------|----------|
|                       |                                                                 |           |                                                             |                          | twelve weeks)                                           |                                                                                 |         | CRDQ Fatigue, Multidimensional Fatigue Inventory, Brief Fatigue Inventory, Functional Assessment of Cancer Therapy – Fatigue scale |           |                    |          |
|                       |                                                                 |           |                                                             |                          |                                                         |                                                                                 |         |                                                                                                                                    |           |                    |          |
| <b>Furmaniak 2016</b> | Exercise for women receiving adjuvant therapy for breast cancer | 32 (2626) | Women receiving adjuvant therapy (chemo- or radiotherapy or | Supervised or home based | Aerobic or resistance exercise or a combination of both | Control intervention (usual care or intervention that was not exercise, such as | Fatigue | FACIT-F scale, the revised Piper Fatigue Scale, Multidimensional Fatigue Inventory, the Schwartz                                   | 19 (1698) | Favor intervention | MODERATE |

|                       |                                                                 |           |                                                                                     |                          |                                                         |                                                                                             |         |                                                                                                                                                                                 |         |                    |    |
|-----------------------|-----------------------------------------------------------------|-----------|-------------------------------------------------------------------------------------|--------------------------|---------------------------------------------------------|---------------------------------------------------------------------------------------------|---------|---------------------------------------------------------------------------------------------------------------------------------------------------------------------------------|---------|--------------------|----|
|                       |                                                                 |           | both) for breast cancer                                                             |                          |                                                         | stretching)                                                                                 |         | Cancer Fatigue Scale, and the Fatigue Assessment Questionnaire and the Fatigue Quality List                                                                                     |         |                    |    |
| <b>Furmaniak 2016</b> | Exercise for women receiving adjuvant therapy for breast cancer | 32 (2626) | Women receiving adjuvant therapy (chemo- or radiotherapy or both) for breast cancer | Supervised or home based | Aerobic or resistance exercise or a combination of both | Control intervention (usual care or intervention that was not exercise, such as stretching) | Fatigue | FACIT-F scale, the revised Piper Fatigue Scale, Multidimensional Fatigue Inventory, the Schwartz Cancer Fatigue Scale, and the Fatigue Assessment Questionnaire and the Fatigue | 8 (814) | Favor intervention | NR |

|                    |                                                                                                                 |           |                                       |                                     |                          |            |                      |                                             |          |                    |          |
|--------------------|-----------------------------------------------------------------------------------------------------------------|-----------|---------------------------------------|-------------------------------------|--------------------------|------------|----------------------|---------------------------------------------|----------|--------------------|----------|
|                    |                                                                                                                 |           |                                       |                                     |                          |            |                      | Quality List                                |          |                    |          |
| <b>Grande 2021</b> | Exercise for cancer cachexia in adults                                                                          | 4 (178)   | People with cancer cachexia in adults | Cancer centres                      | Exercise plus usual care | Usual care | Fatigue              | MFI Questionnaire (Follow-up: 8 weeks)      | 1 (20)   | No effect          | VERY LOW |
| <b>Grande 2021</b> | Exercise for cancer cachexia in adults                                                                          | 4 (178)   | People with cancer cachexia in adults | Cancer centres                      | Exercise plus usual care | Usual care | Fatigue              | Fatigue Severity scale (Follow-up: 6 weeks) | 1 (44)   | No effect          | VERY LOW |
| <b>Cramer 2017</b> | Yoga for improving health-related quality of life, mental health and cancer-related symptoms in women diagnosed | 24 (2166) | Women with diagnosed breast cancer    | Inpatient and outpatient facilities | Yoga                     | No therapy | Fatigue (short-term) | Self-assessed questionnaires                | 11 (883) | Favor intervention | MODERATE |

|                    |                                                                                                                                     |           |                                    |                                     |      |                                        |                       |                              |         |                    |          |
|--------------------|-------------------------------------------------------------------------------------------------------------------------------------|-----------|------------------------------------|-------------------------------------|------|----------------------------------------|-----------------------|------------------------------|---------|--------------------|----------|
|                    | with breast cancer                                                                                                                  |           |                                    |                                     |      |                                        |                       |                              |         |                    |          |
| <b>Cramer 2017</b> | Yoga for improving health-related quality of life , mental health and cancer-related symptoms in women diagnosed with breast cancer | 24 (2166) | Women with diagnosed breast cancer | Inpatient and outpatient facilities | Yoga | No therapy                             | Fatigue (medium-term) | Self-assessed questionnaires | 2 (146) | No effect          | LOW      |
| <b>Cramer 2017</b> | Yoga for improving health-related quality of life , mental health and cancer-related symptoms in women diagnosed                    | 24 (2166) | Women with diagnosed breast cancer | Inpatient and outpatient facilities | Yoga | Psychosocial/educational interventions | Fatigue (short-term)  | Self-assessed questionnaires | 2 (106) | Favor intervention | MODERATE |

|                    |                                                                                                                                    |           |                                                                |                                     |                  |          |         |                                                                       |         |                    |          |
|--------------------|------------------------------------------------------------------------------------------------------------------------------------|-----------|----------------------------------------------------------------|-------------------------------------|------------------|----------|---------|-----------------------------------------------------------------------|---------|--------------------|----------|
|                    | with breast cancer                                                                                                                 |           |                                                                |                                     |                  |          |         |                                                                       |         |                    |          |
| <b>Cramer 2017</b> | Yoga for improving health-related quality of life, mental health and cancer-related symptoms in women diagnosed with breast cancer | 24 (2166) | Women with diagnosed breast cancer                             | Inpatient and outpatient facilities | Yoga             | Exercise | Fatigue | Self-assessed questionnaires                                          | 3 (233) | No effect          | VERY LOW |
| <b>Larun 2019</b>  | Exercise therapy for chronic fatigue syndrome                                                                                      | 8 (1518)  | Men and women aged over 18 years with chronic fatigue syndrome | Outpatient, primary care            | Exercise therapy | Control  | Fatigue | Chalder Fatigue Scale (0-11; 0-33, or 0-42 points) (end of treatment) | 7 (840) | Favor intervention | MODERATE |

|                   |                                               |          |                                                                |                          |                  |                                  |                                  |                                                                                                 |         |                    |                 |
|-------------------|-----------------------------------------------|----------|----------------------------------------------------------------|--------------------------|------------------|----------------------------------|----------------------------------|-------------------------------------------------------------------------------------------------|---------|--------------------|-----------------|
| <b>Larun 2019</b> | Exercise therapy for chronic fatigue syndrome | 8 (1518) | Men and women aged over 18 years with chronic fatigue syndrome | Outpatient, primary care | Exercise therapy | Control                          | Fatigue (Follow-up: 52-70 weeks) | Chalder Fatigue Scale (0-112, or 0-33 points)                                                   | 4 (670) | Favor intervention | <b>VERY LOW</b> |
| <b>Larun 2019</b> | Exercise therapy for chronic fatigue syndrome | 8 (1518) | Men and women aged over 18 years with chronic fatigue syndrome | Outpatient, primary care | Exercise therapy | Cognitive-behavior therapy (CBT) | Fatigue                          | Chalder Fatigue Scale (0-33 points) (end of treatment)                                          | 1 (298) | No effect          | <b>LOW</b>      |
| <b>Larun 2019</b> | Exercise therapy for chronic fatigue syndrome | 8 (1518) | Men and women aged over 18 years with chronic fatigue syndrome | Outpatient, primary care | Exercise therapy | Cognitive-behavior therapy (CBT) | Fatigue                          | Chalder Fatigue Scales (0-33 points) or Fatigue Severity Scale (1-7 points) Follow-up: 52 weeks | 2 (351) | No effect          | <b>MODERATE</b> |

|                   |                                               |          |                                                                |                          |                  |                             |         |                                                         |         |                    |          |
|-------------------|-----------------------------------------------|----------|----------------------------------------------------------------|--------------------------|------------------|-----------------------------|---------|---------------------------------------------------------|---------|--------------------|----------|
| <b>Larun 2019</b> | Exercise therapy for chronic fatigue syndrome | 8 (1518) | Men and women aged over 18 years with chronic fatigue syndrome | Outpatient, primary care | Exercise therapy | Adaptive pacing therapy     | Fatigue | Chalder Fatigue Scales (0-33 points) (end of treatment) | 1 (305) | Favor intervention | LOW      |
| <b>Larun 2019</b> | Exercise therapy for chronic fatigue syndrome | 8 (1518) | Men and women aged over 18 years with chronic fatigue syndrome | Outpatient, primary care | Exercise therapy | Adaptive pacing therapy     | Fatigue | Chalder Fatigue Scale (0-33 points) (end of treatment)  | 1 (307) | Favor intervention | LOW      |
| <b>Larun 2019</b> | Exercise therapy for chronic fatigue syndrome | 8 (1518) | Men and women aged over 18 years with chronic fatigue syndrome | Outpatient               | Exercise therapy | Antidepressant (fluoxetine) | Fatigue | Chalder Fatigue Scale (0-42 points) (end of treatment)  | 1 (48)  | No effect          | VERY LOW |

|                    |                                                              |           |                                                                |                      |                                                  |                             |         |                                                                                          |         |                    |          |
|--------------------|--------------------------------------------------------------|-----------|----------------------------------------------------------------|----------------------|--------------------------------------------------|-----------------------------|---------|------------------------------------------------------------------------------------------|---------|--------------------|----------|
| <b>Larun 2019</b>  | Exercise therapy for chronic fatigue syndrome                | 8 (1518)  | Men and women aged over 18 years with chronic fatigue syndrome | Outpatient           | Exercise therapy and antidepressant (fluoxetine) | Antidepressant (fluoxetine) | Fatigue | Chalder Fatigue Scale (0-42 points) (end of treatment)                                   | 1 (43)  | No effect          | VERY LOW |
| <b>Natale 2019</b> | Interventions for improving sleep quality in people with CKD | 67 (3427) | People with CKD                                                | Any clinical setting | Exercise                                         | Control                     | Fatigue | PIPER Fatigue Scale (PFS) and Visual Analogue Scale (VAS) (Follow-up: median 13.2 weeks) | 2 (107) | Favor intervention | MODERATE |
| <b>Natale 2019</b> | Interventions for improving sleep quality in people with CKD | 67 (3427) | People with CKD                                                | Any clinical setting | Acupuncture                                      | No treatment                | Fatigue | PIPER Fatigue Scale (PFS) (Follow-up: median 4 weeks)                                    | 2 (137) | Favor intervention | MODERATE |



|                        |                                                              |           |                                           |                                                               |                         |                                                    |                 |                                       |         |           |    |
|------------------------|--------------------------------------------------------------|-----------|-------------------------------------------|---------------------------------------------------------------|-------------------------|----------------------------------------------------|-----------------|---------------------------------------|---------|-----------|----|
| <b>Natale 2019</b>     | Interventions for improving sleep quality in people with CKD | 67 (3427) | People with CKD                           | Any clinical setting                                          | Acupuncture             | Sham acupuncture                                   | Fatigue         | NR (Follow-up: median 4 weeks)        | 1 (67)  | No effect | NR |
| <b>Natale 2019</b>     | Interventions for improving sleep quality in people with CKD | 67 (3427) | People with CKD                           | Any clinical setting                                          | Ehealth educational     | Control                                            | Fatigue         | NR                                    | 1 (90)  | No effect | NR |
| <b>Stevenso n 2017</b> | eHealth interventions for people with CKD                    | 43 (6617) | People with CKD                           | Dialysis units                                                | Video education program | Oral education program                             | Quality of life | SF-36 (end intervention)              | 1 (90)  | No effect | NR |
| <b>Cox 2021</b>        | Telerehabilitation for chronic respiratory disease           | 15 (1904) | Patients with chronic respiratory disease | Rehabilitation centres, hospital outpatient departments, home | Telerehabilitation      | Centre-based (outpatient) pulmonary rehabilitation | Quality of life | CRQ fatigue domain (end intervention) | 2 (364) | No effect | NR |

|                    |                                                    |           |                                           |                                                               |                                         |                                                    |                 |                                                    |         |                    |    |
|--------------------|----------------------------------------------------|-----------|-------------------------------------------|---------------------------------------------------------------|-----------------------------------------|----------------------------------------------------|-----------------|----------------------------------------------------|---------|--------------------|----|
| <b>Cox 2021</b>    | Telerehabilitation for chronic respiratory disease | 15 (1904) | Patients with chronic respiratory disease | Rehabilitation centres, hospital outpatient departments, home | Telerehabilitation                      | Centre-based (outpatient) pulmonary rehabilitation | Quality of life | CRQ fatigue score (from baseline to end follow-up) | 2 (364) | No effect          | NR |
| <b>Cox 2021</b>    | Telerehabilitation for chronic respiratory disease | 15 (1904) | Patients with chronic respiratory disease | Rehabilitation centres, hospital outpatient departments, home | Telerehabilitation                      | No rehabilitation control                          | Quality of life | CRQ Emotion domain (end intervention)              | 2 (94)  | Favor intervention | NR |
| <b>Radtke 2017</b> | Physical exercise training for cystic fibrosis     | 15 (487)  | Adults and children with cystic fibrosis  | Outpatients                                                   | Combined aerobic and anaerobic training | No physical training                               | Fatigue at rest | Borg fatigue score                                 | 1 (41)  | No effect          | NR |

|                    |                                                                    |          |                                                                     |                                       |                                                |                                                   |                     |                                                                             |        |                    |     |
|--------------------|--------------------------------------------------------------------|----------|---------------------------------------------------------------------|---------------------------------------|------------------------------------------------|---------------------------------------------------|---------------------|-----------------------------------------------------------------------------|--------|--------------------|-----|
| <b>Radtke 2017</b> | Physical exercise training for cystic fibrosis                     | 15 (487) | Adults and children with cystic fibrosis                            | Outpatients                           | Combined aerobic and anaerobic training        | No physical training                              | Fatigue during 6MWT | Borg fatigue score                                                          | 1 (41) | No effect          | NR  |
| <b>Radtke 2017</b> | Physical exercise training for cystic fibrosis                     | 15 (487) | Adults and children with cystic fibrosis                            | Outpatients                           | NIV during chest physiotherapy (any technique) | No NIV during chest physiotherapy (any technique) | NR                  | NR                                                                          | 1 (37) | No effect          | NR  |
| <b>Moran 2017</b>  | Non-invasive ventilation for cystic fibrosis                       | 10 (191) | People with acute or chronic respiratory failure in cystic fibrosis | Inpatients                            | NIV                                            | Chest physiotherapy                               | Fatigue             | Schwartz Fatigue Scale (at hospital discharge)                              | 1 (37) | No effect          | NR  |
| <b>Voet 2019</b>   | Strength training and aerobic exercise training for muscle disease | 14 (428) | People with fascioscapulo humeral muscular                          | At home and in rehabilitation centres | Aerobic exercise                               | No training                                       | Experienced fatigue | Checklist Individual Strength Scale from 7 to 56 (Follow-up: mean 16 weeks) | 1 (52) | Favor intervention | LOW |

|                     |                                                                    |           |                                                      |                                                                                       |                                        |                                                |                     |                                     |         |                    |          |
|---------------------|--------------------------------------------------------------------|-----------|------------------------------------------------------|---------------------------------------------------------------------------------------|----------------------------------------|------------------------------------------------|---------------------|-------------------------------------|---------|--------------------|----------|
|                     |                                                                    |           | dstrophy                                             |                                                                                       |                                        |                                                |                     |                                     |         |                    |          |
| <b>Voet 2019</b>    | Strength training and aerobic exercise training for muscle disease | 14 (428)  | People with fascioscapulo humeral muscular dystrophy | Rehabilitation unit                                                                   | Aerobic exercise and strength training | No training                                    | Experienced fatigue | FSS (Follow-up: mean 24 weeks)      | 1 (16)  | Favor intervention | VERY LOW |
| <b>Bidonde 2019</b> | Mixed exercise training for adults with fibromyalgia               | 29 (2088) | Individuals with fibromyalgia                        | Supervised group exercise with or without additional unsupervised home-based exercise | Mixed exercise training                | Control (no treatment or continued usual care) | Fatigue             | FIQ Fatigue, VAS and SF-36 vitality | 11(493) | Favor intervention | MODERATE |

|                     |                                                      |           |                               |                                                                                       |                         |                                                |         |                                       |         |                    |          |
|---------------------|------------------------------------------------------|-----------|-------------------------------|---------------------------------------------------------------------------------------|-------------------------|------------------------------------------------|---------|---------------------------------------|---------|--------------------|----------|
| <b>Bidonde 2019</b> | Mixed exercise training for adults with fibromyalgia | 29 (2088) | Individuals with fibromyalgia | Supervised group exercise with or without additional unsupervised home-based exercise | Mixed exercise training | Control (no treatment or continued usual care) | Fatigue | VAS, SF-36 and Fatigue Severity Scale | 2 (112) | No effect          | VERY LOW |
| <b>Bidonde 2019</b> | Mixed exercise training for adults with fibromyalgia | 29 (2088) | Individuals with fibromyalgia | Supervised group exercise with or without additional unsupervised home-based exercise | Mixed exercise training | Control (no treatment or continued usual care) | Fatigue | FIQ Fatigue and VAS                   | 1 (67)  | Favor intervention | VERY LOW |

|                     |                                                      |           |                               |                                                                                       |                         |                               |         |                 |         |           |          |
|---------------------|------------------------------------------------------|-----------|-------------------------------|---------------------------------------------------------------------------------------|-------------------------|-------------------------------|---------|-----------------|---------|-----------|----------|
| <b>Bidonde 2019</b> | Mixed exercise training for adults with fibromyalgia | 29 (2088) | Individuals with fibromyalgia | Supervised group exercise with or without additional unsupervised home-based exercise | Mixed exercise training | Self-help programme           | Fatigue | Fatigue (0-100) | 2 (152) | No effect | VERY LOW |
| <b>Bidonde 2019</b> | Mixed exercise training for adults with fibromyalgia | 29 (2088) | Individuals with fibromyalgia | Supervised group exercise with or without additional unsupervised home-based exercise | Mixed exercise training | Cognitive-behavioural therapy | Fatigue | Fatigue (0-100) | 1 (40)  | No effect | VERY LOW |

|                     |                                                      |           |                               |                                                                                       |                         |             |         |                 |        |           |          |
|---------------------|------------------------------------------------------|-----------|-------------------------------|---------------------------------------------------------------------------------------|-------------------------|-------------|---------|-----------------|--------|-----------|----------|
| <b>Bidonde 2019</b> | Mixed exercise training for adults with fibromyalgia | 29 (2088) | Individuals with fibromyalgia | Supervised group exercise with or without additional unsupervised home-based exercise | Mixed exercise training | Biofeedback | Fatigue | Fatigue (0-100) | 1 (82) | No effect | VERY LOW |
| <b>Bidonde 2019</b> | Mixed exercise training for adults with fibromyalgia | 29 (2088) | Individuals with fibromyalgia | Supervised group exercise with or without additional unsupervised home-based exercise | Mixed exercise training | Medications | Fatigue | Fatigue (0-100) | 1 (75) | No effect | VERY LOW |

|                     |                                                      |           |                               |                                                                                       |                                           |                                                                    |         |                 |        |           |          |
|---------------------|------------------------------------------------------|-----------|-------------------------------|---------------------------------------------------------------------------------------|-------------------------------------------|--------------------------------------------------------------------|---------|-----------------|--------|-----------|----------|
| <b>Bidonde 2019</b> | Mixed exercise training for adults with fibromyalgia | 29 (2088) | Individuals with fibromyalgia | Supervised group exercise with or without additional unsupervised home-based exercise | Mixed exercise training                   | Aerobic exercise                                                   | Fatigue | Fatigue (0-100) | 1 (43) | No effect | VERY LOW |
| <b>Bidonde 2019</b> | Mixed exercise training for adults with fibromyalgia | 29 (2088) | Individuals with fibromyalgia | Supervised group exercise with or without additional unsupervised home-based exercise | Aerobic exercise and flexibility exercise | Aerobic exercise with flexibility exercise and resistance exercise | Fatigue | Fatigue (0-100) | 1 (70) | No effect | VERY LOW |



|                     |                                                      |           |                               |                                                                                       |                                                         |                                                               |         |                 |        |           |          |
|---------------------|------------------------------------------------------|-----------|-------------------------------|---------------------------------------------------------------------------------------|---------------------------------------------------------|---------------------------------------------------------------|---------|-----------------|--------|-----------|----------|
| <b>Bidonde 2019</b> | Mixed exercise training for adults with fibromyalgia | 29 (2088) | Individuals with fibromyalgia | Supervised group exercise with or without additional unsupervised home-based exercise | Callisthenics + aerobic exercise + flexibility exercise | Flexibility exercise + resistance exercise + posture exercise | Fatigue | Fatigue (0-100) | 1 (27) | No effect | VERY LOW |
| <b>Bidonde 2019</b> | Mixed exercise training for adults with fibromyalgia | 29 (2088) | Individuals with fibromyalgia | Supervised group exercise with or without additional unsupervised home-based exercise | Flexibility exercise training                           | Aerobic exercise training                                     | NR      | NR              | 2 (75) | No effect | VERY LOW |

|                     |                                                      |           |                               |                                                                                       |                               |                     |    |    |         |           |          |
|---------------------|------------------------------------------------------|-----------|-------------------------------|---------------------------------------------------------------------------------------|-------------------------------|---------------------|----|----|---------|-----------|----------|
| <b>Bidonde 2019</b> | Mixed exercise training for adults with fibromyalgia | 29 (2088) | Individuals with fibromyalgia | Supervised group exercise with or without additional unsupervised home-based exercise | Flexibility exercise training | Resistance training | NR | NR | 2 (122) | No effect | VERY LOW |
| <b>Bidonde 2019</b> | Mixed exercise training for adults with fibromyalgia | 29 (2088) | Individuals with fibromyalgia | Supervised group exercise with or without additional unsupervised home-based exercise | Flexibility exercise training | Tai chi             | NR | NR | 1 (81)  | No effect | VERY LOW |

|                     |                                                      |           |                               |                                                                                       |                                          |           |    |    |        |                    |          |
|---------------------|------------------------------------------------------|-----------|-------------------------------|---------------------------------------------------------------------------------------|------------------------------------------|-----------|----|----|--------|--------------------|----------|
| <b>Bidonde 2019</b> | Mixed exercise training for adults with fibromyalgia | 29 (2088) | Individuals with fibromyalgia | Supervised group exercise with or without additional unsupervised home-based exercise | Flexibility exercise training            | Acquatics | NR | NR | 1 (39) | Favor comparator   | VERY LOW |
| <b>Bidonde 2019</b> | Mixed exercise training for adults with fibromyalgia | 29 (2088) | Individuals with fibromyalgia | Supervised group exercise with or without additional unsupervised home-based exercise | Whole body vibration plus mixed exercise | Control   | NR | NR | 1 (21) | Favor intervention | VERY LOW |

|                     |                                                      |           |                               |                                                                                       |                                          |                 |    |    |         |           |          |
|---------------------|------------------------------------------------------|-----------|-------------------------------|---------------------------------------------------------------------------------------|------------------------------------------|-----------------|----|----|---------|-----------|----------|
| <b>Bidonde 2019</b> | Mixed exercise training for adults with fibromyalgia | 29 (2088) | Individuals with fibromyalgia | Supervised group exercise with or without additional unsupervised home-based exercise | Whole body vibration plus mixed exercise | Other therapies | NR | NR | 2 (49)  | No effect | VERY LOW |
| <b>Bidonde 2019</b> | Mixed exercise training for adults with fibromyalgia | 29 (2088) | Individuals with fibromyalgia | Supervised group exercise with or without additional unsupervised home-based exercise | Aerobic training                         | Control         | NR | NR | 3 (246) | No effect | LOW      |

|                     |                                                            |           |                               |                                                                                       |                               |                     |         |                                                                |         |           |          |
|---------------------|------------------------------------------------------------|-----------|-------------------------------|---------------------------------------------------------------------------------------|-------------------------------|---------------------|---------|----------------------------------------------------------------|---------|-----------|----------|
| <b>Bidonde 2019</b> | Mixed exercise training for adults with fibromyalgia       | 29 (2088) | Individuals with fibromyalgia | Supervised group exercise with or without additional unsupervised home-based exercise | Aerobic training              | Control             | NR      | NR                                                             | 2 (100) | No effect | VERY LOW |
| <b>Kim 2019</b>     | Flexibility exercise training for adults with fibromyalgia | 12 (743)  | Adults with fibromyalgia      | Group and home program                                                                | Flexibility exercise training | Aerobic training    | Fatigue | FIQ and SF-36 converted (Follow-up: range 8 weeks to 20 weeks) | 2 (75)  | No effect | VERY LOW |
| <b>Kim 2019</b>     | Flexibility exercise training for adults with fibromyalgia | 12 (743)  | Adults with fibromyalgia      | Group and home program                                                                | Flexibility exercise training | Resistance training | Fatigue | SF-36 and FIQ (end intervention)                               | 2 (122) | No effect | VERY LOW |

|                      |                                                            |          |                               |                        |                                          |                 |         |                        |        |                    |          |
|----------------------|------------------------------------------------------------|----------|-------------------------------|------------------------|------------------------------------------|-----------------|---------|------------------------|--------|--------------------|----------|
| <b>Kim 2019</b>      | Flexibility exercise training for adults with fibromyalgia | 12 (743) | Adults with fibromyalgia      | Group and home program | Flexibility exercise training            | Tai chi         | Fatigue | FIQ (end intervention) | 1 (81) | No effect          | VERY LOW |
| <b>Kim 2019</b>      | Flexibility exercise training for adults with fibromyalgia | 12 (743) | Adults with fibromyalgia      | Group and home program | Flexibility exercise training            | Acquatics       | Fatigue | FIQ (end intervention) | 1 (39) | Favor comparator   | VERY LOW |
| <b>Bidonde 2017a</b> | Whole body vibration exercise training for fibromyalgia    | 4 (150)  | Individuals with fibromyalgia | Unspecified            | Whole body vibration plus mixed exercise | Control         | Fatigue | FIQ                    | 1 (21) | Favor intervention | VERY LOW |
| <b>Bidonde 2017a</b> | Whole body vibration exercise training for fibromyalgia    | 4 (150)  | Individuals with fibromyalgia | Unspecified            | Whole body vibration plus mixed exercise | Other therapies | Fatigue | FIQ                    | 2 (49) | No effect          | VERY LOW |

|                      |                                                        |          |                               |                      |                           |                                                                                                               |         |                                                                                                      |         |           |          |
|----------------------|--------------------------------------------------------|----------|-------------------------------|----------------------|---------------------------|---------------------------------------------------------------------------------------------------------------|---------|------------------------------------------------------------------------------------------------------|---------|-----------|----------|
| <b>Bidonde 2017b</b> | Aerobic exercise training for adults with fibromyalgia | 13 (839) | Individuals with fibromyalgia | Group and supervised | Aerobic exercise training | Control (treatment as usual, wait list control, continuation of daily activities including physical activity) | Fatigue | Visual Analogue Scale Follow-up: 14-24 weeks                                                         | 3 (246) | No effect | LOW      |
| <b>Bidonde 2017b</b> | Aerobic exercise training for adults with fibromyalgia | 13 (839) | Individuals with fibromyalgia | Group and supervised | Aerobic exercise training | Control (treatment as usual, wait list control, continuation of daily activities including physical activity) | Fatigue | SF-36 Vitality Scale and Visual Analogue Scale (VAS) Follow-up: from 12 weeks after end intervention | 2 (100) | No effect | VERY LOW |

|                     |                                  |           |                                 |                                                        |                                       |                                          |         |                                |         |                    |          |
|---------------------|----------------------------------|-----------|---------------------------------|--------------------------------------------------------|---------------------------------------|------------------------------------------|---------|--------------------------------|---------|--------------------|----------|
| <b>Farrell 2020</b> | Interventions for fatigue in IBD | 14 (3741) | Participants with quiescent IBD | Outpatients from a single centre in the United Kingdom | Physical activity advice plus omega 3 | No physical activity advice plus omega 3 | Fatigue | FACIT-F (Follow-up: 12 weeks)  | 1 (25)  | No effect          | VERY LOW |
| <b>Farrell 2020</b> | Interventions for fatigue in IBD | 14 (3741) | Participants with quiescent IBD | Outpatients from a single centre in the United Kingdom | Physical activity advice plus placebo | No physical activity advice plus placebo | Fatigue | FACIT-F (Follow-up: 12 weeks)  | 1 (27)  | No effect          | VERY LOW |
| <b>Farrell 2020</b> | Interventions for fatigue in IBD | 14 (3741) | Participants with quiescent IBD | Outpatients from a single centre in the United Kingdom | Physical activity advice plus placebo | No physical activity advice plus omega 3 | Fatigue | FACIT-F (Follow-up: 12 weeks)  | 1 (29)  | Favor intervention | VERY LOW |
| <b>Dowman 2021</b>  | Pulmonary rehabilitation for ILD | 21 (909)  | People with ILD                 | Outpatient and inpatient setting                       | Pulmonary rehabilitation              | No pulmonary rehabilitation              | Fatigue | CRQ Fatigue (end intervention) | 5 (321) | Favor intervention | NR       |



|                      |                                                          |          |                                                |                                                                      |                             |                              |                      |                                      |         |                    |          |
|----------------------|----------------------------------------------------------|----------|------------------------------------------------|----------------------------------------------------------------------|-----------------------------|------------------------------|----------------------|--------------------------------------|---------|--------------------|----------|
| <b>Dowman 2021</b>   | Pulmonary rehabilitation for ILD                         | 21 (909) | People with ILD                                | Outpatient setting                                                   | Pulmonary rehabilitation    | No pulmonary rehabilitation  | Fatigue              | CRQ Fatigue (Follow-up: NR)          | 4 (269) | Favor intervention | NR       |
| <b>Rietberg 2017</b> | Respiratory muscle training for MS                       | 6 (195)  | People with multiple sclerosis                 | Home, outpatient rehabilitation, and outpatient neurology department | Respiratory muscle training | Sham training or no training | Fatigue              | Fatigue Severity Scale (0-56 points) | 2 (56)  | No effect          | LOW      |
| <b>Amatya 2018</b>   | Non-pharmacological interventions for chronic pain in MS | 10 (565) | Chronic musculoskeletal pain in people with MS | Participants were recruited from MS Association of Almeria (Spain)   | Ai Chi exercises            | Sham                         | Reduction in fatigue | MFIS                                 | 1 (73)  | NA                 | VERY LOW |

|                    |                                                                   |           |                                 |                            |                                                |                 |                      |                                                |         |           |          |
|--------------------|-------------------------------------------------------------------|-----------|---------------------------------|----------------------------|------------------------------------------------|-----------------|----------------------|------------------------------------------------|---------|-----------|----------|
| <b>Amatya 2018</b> | Non-pharmacological interventions for chronic pain in MS          | 10 (565)  | Chronic neuropathic pain in MS  | Community neurology clinic | Transcranial Direct Current Stimulation (tDCS) | Sham            | Reduction in fatigue | MFIS                                           | 1 (16)  | NA        | VERY LOW |
| <b>Amatya 2018</b> | Non-pharmacological interventions for chronic pain in MS          | 10 (565)  | Chronic neuropathic pain in MS  | Hospital MS clinics        | Transcranial Random Noise Stimulation (tRNS)   | Sham            | Reduction in fatigue | MFIS                                           | 1 (16)  | NA        | VERY LOW |
| <b>Burge 2020</b>  | Interventions for promoting physical activity in people with COPD | 76 (8018) | People with a diagnosis of COPD | NR                         | PR/exercise training                           | No intervention | Fatigue              | CRQ domain scores (end intervention)           | 3 (182) | No effect | LOW      |
| <b>Burge 2020</b>  | Interventions for promoting physical activity in people with COPD | 76 (8018) | People with a diagnosis of COPD | NR                         | Physical activity counselling                  | No intervention | Fatigue              | CRQ domain and total scores (end intervention) | 1 (98)  | No effect | LOW      |

|                   |                                                                   |           |                                 |    |                                                      |                 |         |                                         |         |                    |          |
|-------------------|-------------------------------------------------------------------|-----------|---------------------------------|----|------------------------------------------------------|-----------------|---------|-----------------------------------------|---------|--------------------|----------|
| <b>Burge 2020</b> | Interventions for promoting physical activity in people with COPD | 76 (8018) | People with a diagnosis of COPD | NR | Self-management (SPACE)                              | No intervention | Fatigue | CRQ domain scores (end intervention)    | 1 (155) | Favor intervention | LOW      |
| <b>Burge 2020</b> | Interventions for promoting physical activity in people with COPD | 76 (8018) | People with a diagnosis of COPD | NR | Self-management (SPACE)                              | No intervention | Fatigue | CRQ domain scores (Follow-up: 6 months) | 1 (184) | No effect          | LOW      |
| <b>Burge 2020</b> | Interventions for promoting physical activity in people with COPD | 76 (8018) | People with a diagnosis of COPD | NR | Four-wheeled walker                                  | No intervention | Fatigue | CRQ domain scores (end intervention)    | 1 (17)  | No effect          | VERY LOW |
| <b>Burge 2020</b> | Interventions for promoting physical activity in people with COPD | 76 (8018) | People with a diagnosis of COPD | NR | Exercise training (COPE-active) with self-management | Self-management | Fatigue | CRQ domain scores (Mid-intervention)    | 1 (131) | No effect          | LOW      |

|                   |                                                                           |           |                                 |    |                                                            |                                    |         |                                          |         |                    |          |
|-------------------|---------------------------------------------------------------------------|-----------|---------------------------------|----|------------------------------------------------------------|------------------------------------|---------|------------------------------------------|---------|--------------------|----------|
| <b>Burge 2020</b> | Interventions for promoting physical activity in people with chronic COPD | 76 (8018) | People with a diagnosis of COPD | NR | Exercise training (COPE-active) with self-management       | Self-management                    | Fatigue | CRQ domain scores (end intervention)     | 1 (139) | No effect          | LOW      |
| <b>Burge 2020</b> | Interventions for promoting physical activity in people with COPD         | 76 (8018) | People with a diagnosis of COPD | NR | Exercise training (COPE-active) with self-management       | Self-management                    | Fatigue | CRQ domain scores (Follow-up: 18 months) | 1 (131) | No effect          | LOW      |
| <b>Burge 2020</b> | Interventions for promoting physical activity in people with COPD         | 76 (8018) | People with a diagnosis of COPD | NR | Exercise training (COPE-active) with self-management       | Self-management                    | Fatigue | CRQ domain scores (Follow-up: 24 months) | 1 (125) | No effect          | LOW      |
| <b>Burge 2020</b> | Interventions for promoting physical activity in people with COPD         | 76 (8018) | People with a diagnosis of COPD | NR | Exercise training and LAMA/LABA with behavior modification | Placebo with behavior modification | Fatigue | CRQ domain scores (Mid-intervention)     | 1 (134) | Favor intervention | MODERATE |

|                   |                                                                   |           |                                 |    |                                                            |                                    |         |                                      |         |                    |          |
|-------------------|-------------------------------------------------------------------|-----------|---------------------------------|----|------------------------------------------------------------|------------------------------------|---------|--------------------------------------|---------|--------------------|----------|
| <b>Burge 2020</b> | Interventions for promoting physical activity in people with COPD | 76 (8018) | People with a diagnosis of COPD | NR | Exercise training and LAMA/LABA with behavior modification | Placebo with behavior modification | Fatigue | CRQ domain scores (end intervention) | 1 (131) | Favor intervention | MODERATE |
| <b>Burge 2020</b> | Interventions for promoting physical activity in people with COPD | 76 (8018) | People with a diagnosis of COPD | NR | Exercise training and LAMA/LABA with behavior modification | LAMA and behavior modification     | Fatigue | CRQ domain scores (Mid-intervention) | 1 (136) | No effect          | MODERATE |
| <b>Burge 2020</b> | Interventions for promoting physical activity in people with COPD | 76 (8018) | People with a diagnosis of COPD | NR | Exercise training and LAMA/LABA with behavior modification | LAMA and behavior modification     | Fatigue | CRQ domain scores (end intervention) | 1 (132) | Favor intervention | MODERATE |

|                   |                                                                   |           |                                 |    |                                                                   |                                      |         |                                      |         |           |          |
|-------------------|-------------------------------------------------------------------|-----------|---------------------------------|----|-------------------------------------------------------------------|--------------------------------------|---------|--------------------------------------|---------|-----------|----------|
| <b>Burge 2020</b> | Interventions for promoting physical activity in people with COPD | 76 (8018) | People with a diagnosis of COPD | NR | Exercise training and LAMA/LABA with behaviour modification       | LAMA/LABA and behaviour modification | Fatigue | CRQ domain scores (Mid-intervention) | 1 (140) | No effect | MODERATE |
| <b>Burge 2020</b> | Interventions for promoting physical activity in people with COPD | 76 (8018) | People with a diagnosis of COPD | NR | Exercise training and LAMA/LABA with behaviour modification       | LAMA/LABA and behaviour modification | Fatigue | CRQ domain scores (end intervention) | 1 (138) | No effect | MODERATE |
| <b>Burge 2020</b> | Interventions for promoting physical activity in people with COPD | 76 (8018) | People with a diagnosis of COPD | NR | Physical activity counselling (app) with pulmonary rehabilitation | Optional supervised exercise         | NR      | NR                                   | 1 (139) | No effect | LOW      |

|                   |                                                                   |           |                                 |    |                                                                   |                              |         |                                      |         |                    |     |
|-------------------|-------------------------------------------------------------------|-----------|---------------------------------|----|-------------------------------------------------------------------|------------------------------|---------|--------------------------------------|---------|--------------------|-----|
| <b>Burge 2020</b> | Interventions for promoting physical activity in people with COPD | 76 (8018) | People with a diagnosis of COPD | NR | Physical activity counselling (app) with pulmonary rehabilitation | Optional supervised exercise | NR      | NR                                   | 1 (132) | Favor intervention | LOW |
| <b>Burge 2020</b> | Interventions for promoting physical activity in people with COPD | 76 (8018) | People with a diagnosis of COPD | NR | Physical activity counselling (app) with pulmonary rehabilitation | Optional supervised exercise | NR      | NR                                   | 1 (121) | No effect          | LOW |
| <b>Burge 2020</b> | Interventions for promoting physical activity in people with COPD | 76 (8018) | People with a diagnosis of COPD | NR | Physical activity counselling with pulmonary rehabilitation       | Pulmonary rehabilitation     | Fatigue | CRQ domain scores (end intervention) | 1 (27)  | No effect          | LOW |
| <b>Burge 2020</b> | Interventions for promoting physical activity in people with COPD | 76 (8018) | People with a diagnosis of COPD | NR | Non-invasive ventilation with pulmonary-rehabilitation            | Pulmonary rehabilitation     | Fatigue | CRQ domain scores (end intervention) | 1 (56)  | Favor intervention | LOW |

|                   |                                                                   |           |                                 |    |                                     |                                       |         |                                |         |           |     |
|-------------------|-------------------------------------------------------------------|-----------|---------------------------------|----|-------------------------------------|---------------------------------------|---------|--------------------------------|---------|-----------|-----|
| <b>Burge 2020</b> | Interventions for promoting physical activity in people with COPD | 76 (8018) | People with a diagnosis of COPD | NR | Water-based exercise training       | Land-based exercise training          | Fatigue | CRQ domains (Mid-intervention) | 1 (36)  | No effect | LOW |
| <b>Burge 2020</b> | Interventions for promoting physical activity in people with COPD | 76 (8018) | People with a diagnosis of COPD | NR | Water-based exercise training       | Land-based exercise training          | Fatigue | CRQ domains (end intervention) | 1 (36)  | No effect | LOW |
| <b>Burge 2020</b> | Interventions for promoting physical activity in people with COPD | 76 (8018) | People with a diagnosis of COPD | NR | Home-based pulmonary rehabilitation | Centre-based pulmonary rehabilitation | Fatigue | CRQ domain score               | 1 (146) | No effect | LOW |
| <b>Burge 2020</b> | Interventions for promoting physical activity in people with COPD | 76 (8018) | People with a diagnosis of COPD | NR | Home-based pulmonary rehabilitation | Centre-based pulmonary rehabilitation | NR      | NR                             | 1 (146) | No effect | LOW |



|                   |                                                                   |           |                                 |    |                                                                                     |                                   |    |    |         |                    |          |
|-------------------|-------------------------------------------------------------------|-----------|---------------------------------|----|-------------------------------------------------------------------------------------|-----------------------------------|----|----|---------|--------------------|----------|
| <b>Burge 2020</b> | Interventions for promoting physical activity in people with COPD | 76 (8018) | People with a diagnosis of COPD | NR | Inspiratory muscle training and pulmonary rehabilitation                            | Sham and pulmonary rehabilitation | NR | NR | 1 (150) | No effect          | MODERATE |
| <b>Burge 2020</b> | Interventions for promoting physical activity in people with COPD | 76 (8018) | People with a diagnosis of COPD | NR | Neuromuscular electrostimulation (NMES)                                             | Usual care                        | NR | NR | 3 (55)  | Favor intervention | NR       |
| <b>Burge 2020</b> | Interventions for promoting physical activity in people with COPD | 76 (8018) | People with a diagnosis of COPD | NR | Multicomponent intervention (rehabilitation, organization of care, pharmacotherapy) | Usual care                        | NR | NR | 1 (33)  | Favor intervention | NR       |

|                   |                                                                   |           |                                 |    |                                                                                     |                   |         |                        |         |                    |          |
|-------------------|-------------------------------------------------------------------|-----------|---------------------------------|----|-------------------------------------------------------------------------------------|-------------------|---------|------------------------|---------|--------------------|----------|
| <b>Burge 2020</b> | Interventions for promoting physical activity in people with COPD | 76 (8018) | People with a diagnosis of COPD | NR | Multicomponent intervention (rehabilitation, organization of care, pharmacotherapy) | Active comparison | NR      | NR                     | 1 (38)  | Favor intervention | NR       |
| <b>Burge 2020</b> | Interventions for promoting physical activity in people with COPD | 76 (8018) | People with a diagnosis of COPD | NR | Supervised maintenance programme (following pulmonary rehabilitation)               | Usual care        | NR      | NR                     | 4 (210) | Favor intervention | VERY LOW |
| <b>Hill 2018</b>  | Neuromuscular electrostimulation for adults with COPD             | 76 (8018) | People with a diagnosis of COPD | NR | Neuromuscular electrostimulation (NMES)                                             | Usual care        | Fatigue | Fatigue Severity Scale | 3 (55)  | Favor intervention | NR       |

|                      |                                                                                                                                   |           |                                 |    |                                                                                     |            |         |                                                      |         |                    |          |
|----------------------|-----------------------------------------------------------------------------------------------------------------------------------|-----------|---------------------------------|----|-------------------------------------------------------------------------------------|------------|---------|------------------------------------------------------|---------|--------------------|----------|
| <b>Dennett 2021</b>  | Tailored or adapted interventions for adults with chronic COPD and at least one other long-term condition: a mixed methods review | 7 (1197)  | People with a diagnosis of COPD | NR | Multicomponent intervention (rehabilitation, organisation of care, pharmacotherapy) | Usual care | Fatigue | CRQ Fatigue (Follow-up: 8 weeks)                     | 1 (33)  | Favor intervention | NR       |
| <b>Dennett 2021</b>  | Tailored or adapted interventions for adults with COPD and at least one other long-term condition: a mixed methods review         | 7 (1197)  | People with a diagnosis of COPD | NR | Supervised maintenance programme (following pulmonary rehabilitation)               | Usual care | Fatigue | CRQ Fatigue (end intervention)                       | 1 (38)  | Favor intervention | NR       |
| <b>Malaguti 2021</b> | Supervised maintenance programmes following pulmonary rehabilitation                                                              | 21 (1799) | People with a diagnosis of COPD | NR | Supervised maintenance programme (following pulmonary                               | Usual care | Fatigue | CRQ Fatigue (Follow-up: range 6 months to 12 months) | 4 (210) | Favor intervention | VERY LOW |

|                     |                                                                                  |         |                                                           |                                                                  |                                                                                                   |                                                             |         |                                                                                                                                                              |         |           |                 |
|---------------------|----------------------------------------------------------------------------------|---------|-----------------------------------------------------------|------------------------------------------------------------------|---------------------------------------------------------------------------------------------------|-------------------------------------------------------------|---------|--------------------------------------------------------------------------------------------------------------------------------------------------------------|---------|-----------|-----------------|
|                     | compared to usual care for COPD                                                  |         |                                                           |                                                                  | ry rehabilitation)                                                                                |                                                             |         |                                                                                                                                                              |         |           |                 |
| <b>Hassett 2017</b> | Fitness training for cardiorespiratory conditioning after traumatic brain injury | 8 (399) | People with traumatic brain injury of any age or severity | Any setting, including inpatient, outpatient, community and home | Cardiorespiratory exercise programmes usual care, a non-exercise intervention, or no intervention | Usual care, a non-exercise intervention, or no intervention | Fatigue | VAS fatigue scale (0-10 points), the fatigue subscale of the Profile of Moods State and modified version of the Chalder Fatigue Scale. (end of intervention) | 3 (130) | No effect | <b>VERY LOW</b> |
| <b>Hassett 2017</b> | Fitness training for cardiorespiratory conditioning after traumatic              | 8 (399) | People with traumatic brain injury of any age or severity | Any setting, including inpatient, outpatient, comm               | Cardiorespiratory exercise programmes usual care, a non-                                          | Usual care, a non-exercise intervention, or no intervention | Fatigue | Chalder modified fatigue scale                                                                                                                               | 1 (40)  | No effect | NR              |

|  |              |  |  |                |                                           |  |  |  |  |  |  |
|--|--------------|--|--|----------------|-------------------------------------------|--|--|--|--|--|--|
|  | brain injury |  |  | unity and home | exercise intervention, or no intervention |  |  |  |  |  |  |
|--|--------------|--|--|----------------|-------------------------------------------|--|--|--|--|--|--|

ACBT: airway clearance breathing techniques; CKD: chronic kidney disease; COPD: Chronic obstructive pulmonary disease; PEP therapy: positive expiratory pressure therapy; NMES: neuromuscular electrical stimulation; CRQ: chronic respiratory questionnaire; PFS: PIPER Fatigue Scale; GAD: gravity-assisted drainage; HRQOL: Health-related quality of life; IBD: inflammatory bowel disease; ILD: interstitial lung disease; FACT-F: Functional Assessment of Cancer Therapy – Fatigue; NIV: non-invasive ventilation; SF: short form; VAS: visual analogue scale; MS=multiple sclerosis; MFIS=modified fatigue impact scale; NR=not reported.
