# Supplementary material for: Fatigue, post-exertional malaise and orthostatic intolerance: a map of Cochrane evidence relevant to rehabilitation for people with post COVID-19 condition
Source: PubMed Central journal article supplement — Eur J Phys Rehabil Med. 2022 Dec 6;58(6):857–63. doi: 10.23736/S1973-9087.22.07802-9 (PMC10077961; doi:10.23736/s1973-9087.22.07802-9), 2022-12-06
Supplement: Supplementary_Digital_Material3.pdf [file Supplementary_Digital_Material3.pdf]

SUPPLEMENTARY DIGITAL MATERIAL 3

Supplementary Table III.—Summary of included studies on post-exertional malaise symptom.

| <b>Authors</b>      | <b>Title</b>                                                          | <b>Total N° included studies (N° participants)</b> | <b>Population</b>  | <b>Setting</b>     | <b>Intervention</b> | <b>Control</b>                 | <b>Outcome</b>                       | <b>Outcome Measurements</b> | <b>N° studies (N° participants)</b> | <b>Effect</b>      | <b>GRADE</b> |
|---------------------|-----------------------------------------------------------------------|----------------------------------------------------|--------------------|--------------------|---------------------|--------------------------------|--------------------------------------|-----------------------------|-------------------------------------|--------------------|--------------|
| <b>Gendron 2018</b> | AMBM T as an adjunct to or in comparison with PR for people with COPD | 10 (762)                                           | Patients with COPD | Any setting        | AMBM T              | PR                             | Dyspnea (end intervention)           | Borg scale                  | 1 (139)                             | No effect          | VERY LOW     |
| <b>Hill 2018</b>    | NMES for adults with COPD                                             | 16 (267)                                           | Patients with COPD | Outpatient or home | NMES + exercise     | UC (with or without sham NMES) | Exercise capacity (end intervention) | Endurance time (min)        | 3 (55)                              | Favor intervention | VERY LOW     |
| <b>Hill 2018</b>    | NMES for adults with COPD                                             | 16 (267)                                           | Patients with COPD | Outpatient or home | NMES + exercise     | UC (with or without sham NMES) | Dyspnea (end intervention)           | Borg scale                  | 3 (55)                              | No effect          | VERY LOW     |

|                    |                                                                    |          |                    |                                    |                                         |                                      |                                                    |                             |         |           |          |
|--------------------|--------------------------------------------------------------------|----------|--------------------|------------------------------------|-----------------------------------------|--------------------------------------|----------------------------------------------------|-----------------------------|---------|-----------|----------|
| <b>Hill 2018</b>   | NMES for adults with COPD                                          | 16 (267) | Patients with COPD | ICU, inpatient, outpatient or home | NMES + exercise                         | Exercise (with or without sham NMES) | Dyspnea (end intervention)                         | Borg scale                  | 2 (44)  | No effect | VERY LOW |
| <b>Poot 2021</b>   | Integrated disease management interventions for patients with COPD | 15 (487) | Patients with COPD | NR                                 | Integrated disease management           | Control                              | Dyspnea                                            | Borg scale                  | 3 (145) | No effect | NR       |
| <b>Radtke 2017</b> | Physical exercise training for CF                                  | 15 (487) | Patients with CF   | NR                                 | Combined aerobic and anaerobic training | No physical training                 | Functional exercise capacity (Follow-up: 3 months) | 6MWT distance (meters)      | 1 (41)  | No effect | NR       |
| <b>Radtke 2017</b> | Physical exercise training for CF                                  | 15 (487) | Patients with CF   | NR                                 | Combined aerobic and anaerobic training | No physical training                 | Functional exercise capacity (Follow-up: 3 months) | 6MWT distance (% predicted) | 1 (41)  | No effect | NR       |

AMBMT: active mind-body movement therapy; PR: pulmonary rehabilitation; COPD: chronic obstructive pulmonary disease; CF: cystic fibrosis; NMES: neuromuscular electrostimulation; ICU: intensive care unit; UC: usual care; 6MWT: 6-minute walking test; NR: not reported.
